# Supplementary material
Source: publisher figshare collection journal article supplement (https://gsajournals.figshare.com/articles/dataset/_/9368636)
Supplement: Supplementary file 1 [file 1]

# Supplementary File S1

## Genetic Signatures of Drug Response Variability in *Drosophila melanogaster*

Palle Duun Rohde<sup>\*,†,‡</sup>, Iben Ravnborg Jensen<sup>§</sup>, Pernille Merete Sarup<sup>\*</sup>, Michael Ørsted<sup>§</sup>, Ditte Demontis<sup>†,‡,\*\*</sup>, Peter Sørensen<sup>\*</sup>, Torsten Nygaard Kristensen<sup>§,††</sup>

<sup>\*</sup>Center for Quantitative Genetics and Genomics, Department of Molecular Biology and Genetics, Aarhus University, Blichers Alle 20, 8830 Tjele, Denmark.

<sup>†</sup>The Lundbeck Foundation Initiative for Integrative Psychiatric Research, iPSYCH, Denmark.

<sup>‡</sup>Center for Integrative Sequencing, Aarhus University, Denmark.

<sup>§</sup>Section for Biology and Environmental Science, Department of Chemistry and Bioscience, Aalborg University, Fredrik Bajers Vej 7H, 9220 Aalborg, Denmark.

<sup>\*\*</sup>Department of Biomedicine, Aarhus University, Wilhelm Meyers Allé 4, 8000 Aarhus, Denmark.

<sup>††</sup>Section for Genetics, Ecology and Evolution, Department of Bioscience, Aarhus University, Ny Munkegade 116, 8000 Aarhus, Denmark.

### Supplementary Figures

|           |                                                                         |
|-----------|-------------------------------------------------------------------------|
| Figure S1 | Experimental overview figure.                                           |
| Figure S2 | Dose response curve for two isogenic lines.                             |
| Figure S3 | Solution ingested by the DGRP lines as function of DGRP activity.       |
| Figure S4 | DGRP activity data.                                                     |
| Figure S5 | DGRP treatment response as function of activity after SUC.              |
| Figure S6 | Difference in solution ingested as function of DGRP treatment response. |

### Supplementary Tables

|           |                                                                                                            |
|-----------|------------------------------------------------------------------------------------------------------------|
| Table S1  | <i>Drosophila</i> stocks used in the study.                                                                |
| Table S2  | Association tests between chromosomal inversions and <i>Wolbachia</i> infection status with DGRP activity. |
| Table S3  | Experimental effects on DGRP locomotor activity.                                                           |
| Table S4  | Estimated quantitative genetic parameters for DGRP locomotor activity.                                     |
| Table S5  | Gene expression analysis of WT flies. <a href="#">[EXCEL]</a>                                              |
| Table S6  | KEGG pathway enrichment analysis using gene expression data. <a href="#">[EXCEL]</a>                       |
| Table S7  | DGRP phenotypic data. <a href="#">[EXCEL]</a>                                                              |
| Table S8  | DGRP genomic predictions using gene networks. <a href="#">[EXCEL]</a>                                      |
| Table S9  | Ranking of genes within full predictive network. <a href="#">[EXCEL]</a>                                   |
| Table S10 | Set of hub genes related to histone modifying processes.                                                   |
| Table S11 | Gene expression analysis of WT F1 flies. <a href="#">[EXCEL]</a>                                           |
| Table S12 | Gene network enrichment analysis. <a href="#">[EXCEL]</a>                                                  |
| Table S13 | Genes we found associated with MPH that has been found to respond to other drug types.                     |

### Supplementary Data

|              |                                                                                |
|--------------|--------------------------------------------------------------------------------|
| Data file S1 | Phenotypes from DGRP experiments. <a href="#">[EXCEL]</a>                      |
| Data file S2 | Phenotypes from wild type experiments. <a href="#">[EXCEL]</a>                 |
| Data file S3 | Phenotypes from gene expression knockdown experiments. <a href="#">[EXCEL]</a> |

Raw and RMA normalized gene expression data for the wild type mass population and the F1 offspring is available at the Gene Expression Omnibus (GEO) with the accession number: GSE121643.

### Part A: Effect of MPH on wild type males

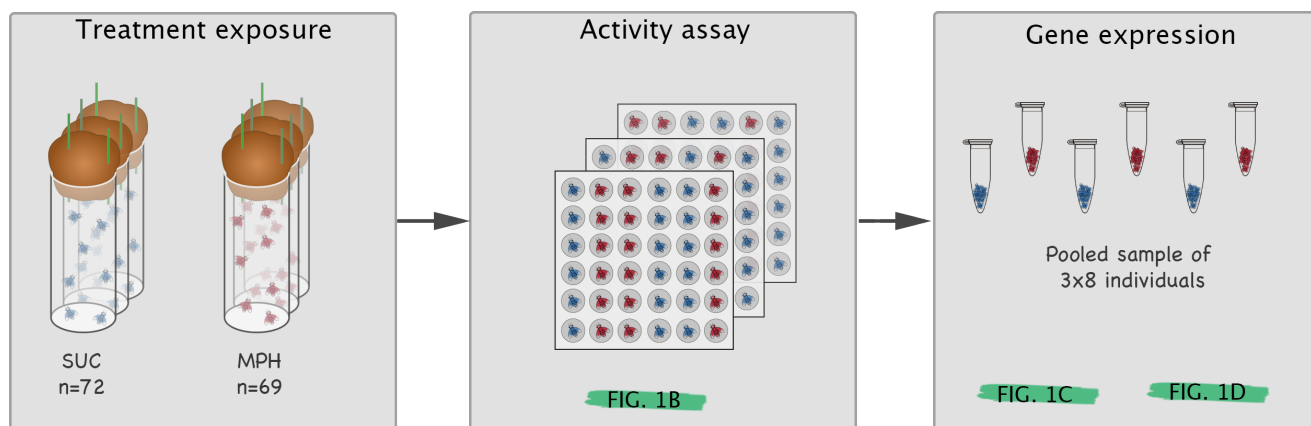

**Figure S1A:** Schematic overview of experimental setup for investigating effects of methylphenidate (MPH) on locomotor activity and on gene expression. Wild type males were exposed to either a solution containing sucrose (SUC, blue flies) or MPH (red flies) using a capillary feeding assay. The flies were exposed to the treatments for approximately 24h in groups of seven individuals. Hereafter, the flies were moved to the activity plates and individual movement tracks were obtained. After the behavioral assays the individuals were frozen down, and three replicates of eight individuals per treatment were randomly sampled and whole-genome gene expression data were obtained. Text collared in green refers to figures in the manuscript presenting results from the experiments.

## Part B: Prediction of DGRP phenotypes, and identify candidate genes for MPH response

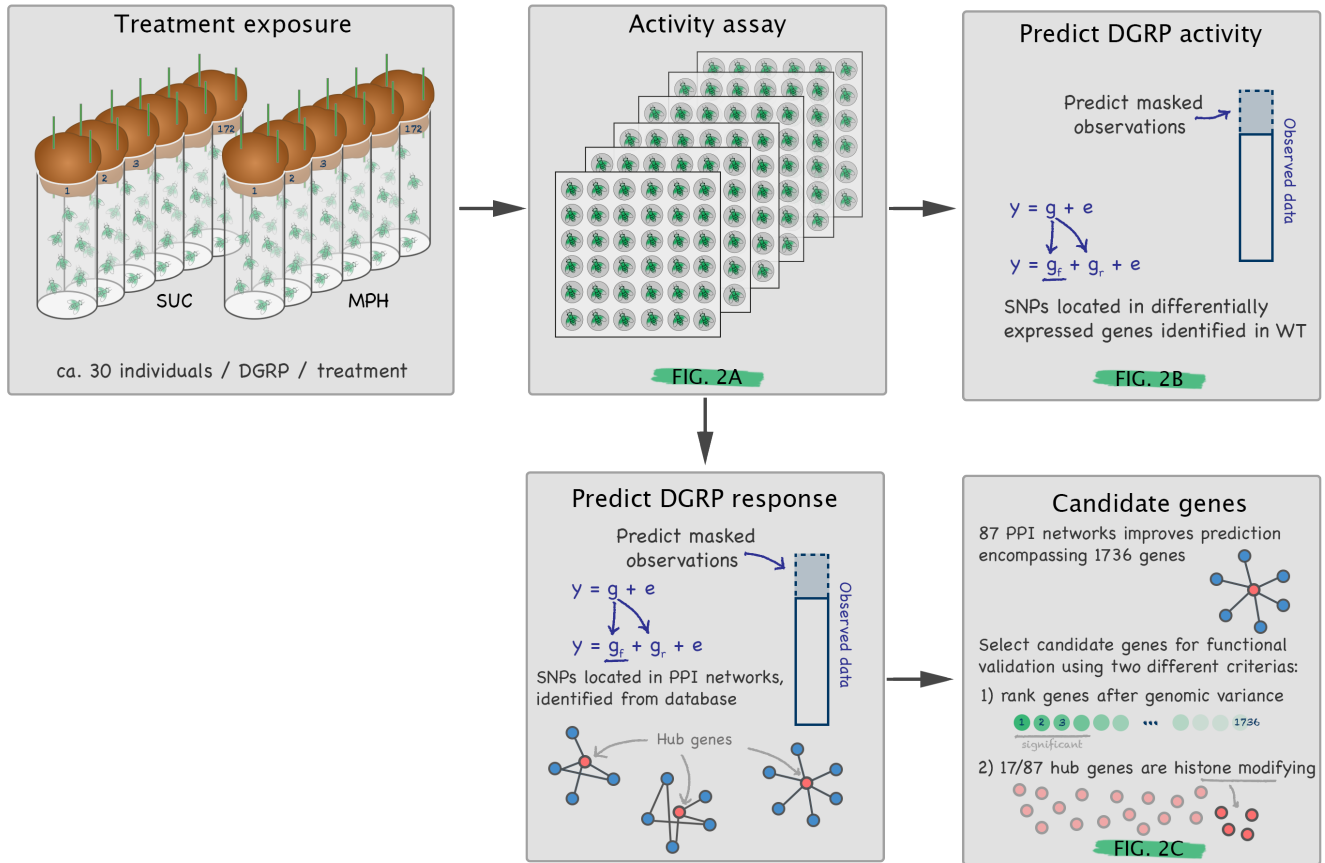

**Figure S1B:** Overview of the procedure for the DGRP experiments and identification of candidate genes. Approximately 30 individuals per DGRP line per treatment were exposed to either sucrose (SUC) or methylphenidate (MPH) using a capillary feeding assay in groups of seven individuals. After approximately 24h the flies were transferred to the activity plates and individual movement tracks were obtained. This procedure was done in blocks over the course of 46 days. Using the genomic feature prediction approach we predicted the DGRP locomotor activity phenotypes by creating feature sets using the gene expression data from the wild type males (Figure S1A). We then quantified the behavioral response to MPH as the within-DGRP line difference in locomotor activity between sucrose- and MPH treated individuals. Using the genomic feature prediction approach we predicted the behavioral response to MPH using feature sets defined using protein-protein interaction (PPI) networks from the STRING database. Among the PPI networks that significantly improved the accuracy of prediction (compared to the null model) we selected 36 genes for functional validation. The selection of candidate genes were based on two different criteria: 1) we ranked all the genes with the predictive PPI networks based on their overall contribution to the genomic variance, and the top 20 genes that contributed significantly were selected. 2) Among the predictive PPI networks, 20% (17/87) of the hub genes turned out to be involved in histone modifying processes (see Table S10 in File S1). Text collared in green refers to figures in the manuscript presenting results from the experiments.

### Part C: Cross generational phenotypic effect of MPH

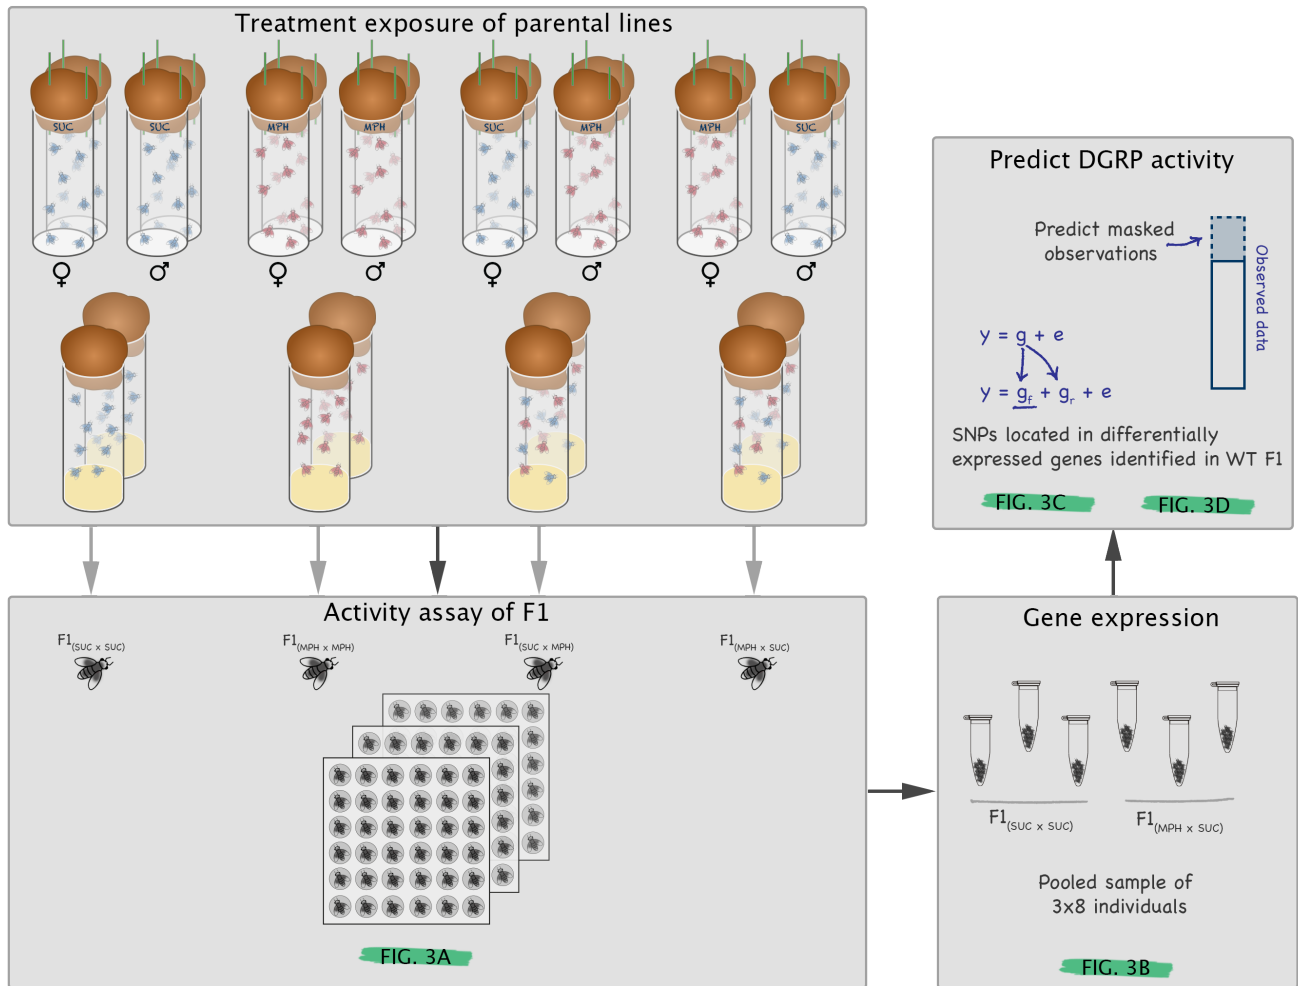

**Figure S1C:** One of the findings from the DGRP experiments (Figure S1B) was that a large proportion of hub genes of the predictive PPI networks were known to be involved in histone modifying processes. Because histone modifying processes are known to cause cross-generation effects, we investigated in a wild type population if MPH caused behavioral effects across generations. We set up different crosses exposing virgin males and females in different combinations to either sucrose (SUC, blue flies) or methylphenidate (MPH, red flies); thus, females and males to SUC, females and males to MPH, females to SUC and males to MPH, and females to MPH and males to SUC. After approximately 24h on capillary feeding assay the flies were transferred to vials containing food and allowed to reproduce. The F1 male offspring were transferred to the activity plates and individual movement tracks were obtained. F1 males from the cross between females and males exposed to SUC, and F1 males from the cross between females exposed to MPH and males to SUC (here the greatest phenotypic difference was observed, Figure 3A), were randomly sampled to obtain three replicates of eight individuals per cross type and whole-genome gene expression data were obtained. Using the genomic feature prediction approach we predicted the DGRP locomotor activity phenotypes by creating feature sets using the gene expression data from F1 wild type males. Text collared in green refers to figures in the manuscript presenting results from the experiments.

### Part D: Comparison of WT and WT F1 gene expression analyses

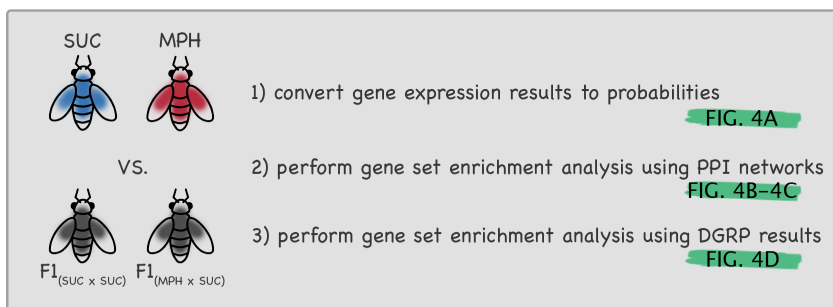

**Figure S1D:** The gene expression data of the wild type males (directly exposed flies, blue and red flies) and wild type F1 males (unexposed individuals, gray flies) were compared. Text collared in green refers to figures in the manuscript presenting results from the experiments.

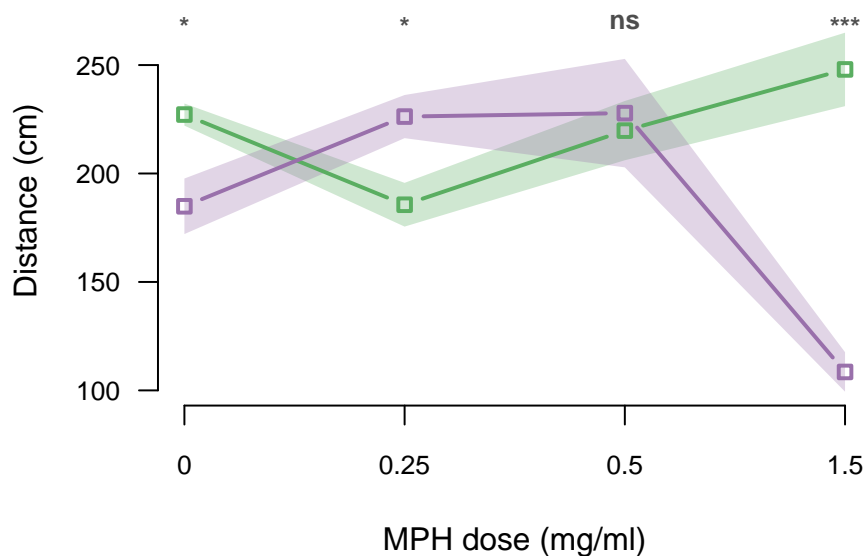

**Figure S2:** Dose response curve for two isogenic lines (purple: DGRP<sub>RAL361</sub>, green: DGRP<sub>RAL381</sub>). Between 15-18 individual flies from each isogenic line were tested at four levels of MPH (0 mg/ml, 0.25 mg/ml, 0.5 mg/ml and 1.5 mg/ml) using the same experimental setup as described for the DGRP experiments. The shaded area around the two curves shows the standard error of the mean. The symbols above the two curves indicate level of significance (\*:  $p < 0.05$ , \*\*\*:  $p < 0.001$ , ns: not significant) comparing activity between the two isogenic lines at each dose of MPH using a  $t$ -test.

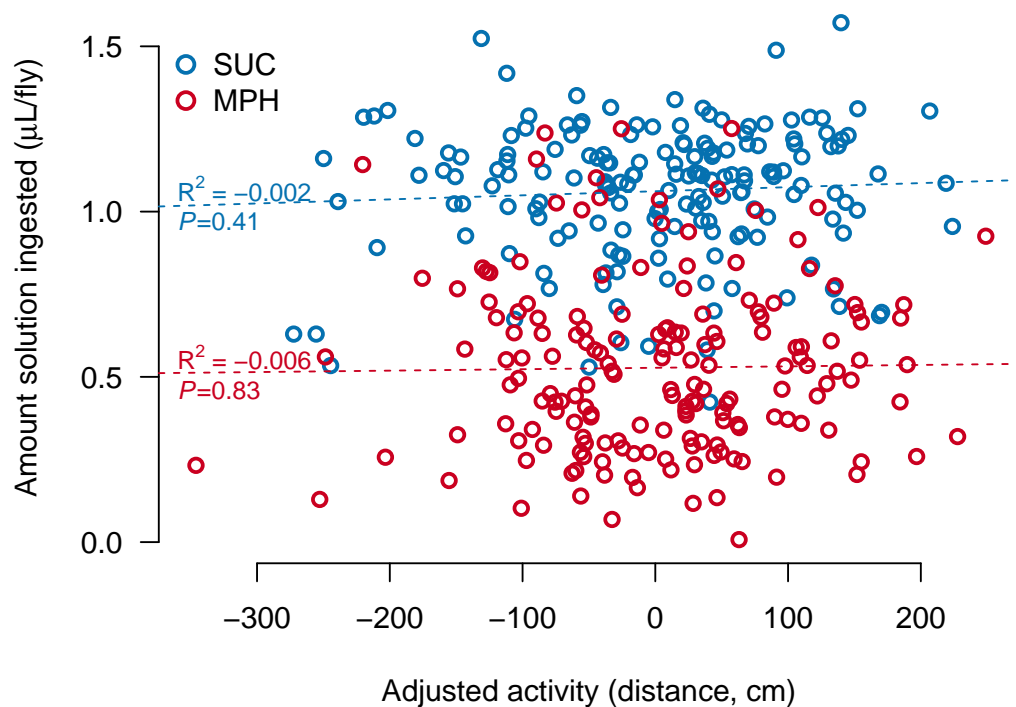

**Figure S3:** Average amount of solution (sucrose (SUC) or methylphenidate (MPH)) ingested per DGRP line as function of distance moved. Dashed lines are the regression of amount of solution ingested on adjusted activity for the two treatments separately. The variance explained by the linear fit ( $R^2$ ), and the  $P$  values from testing if the slopes are different from zero are shown in the plot.

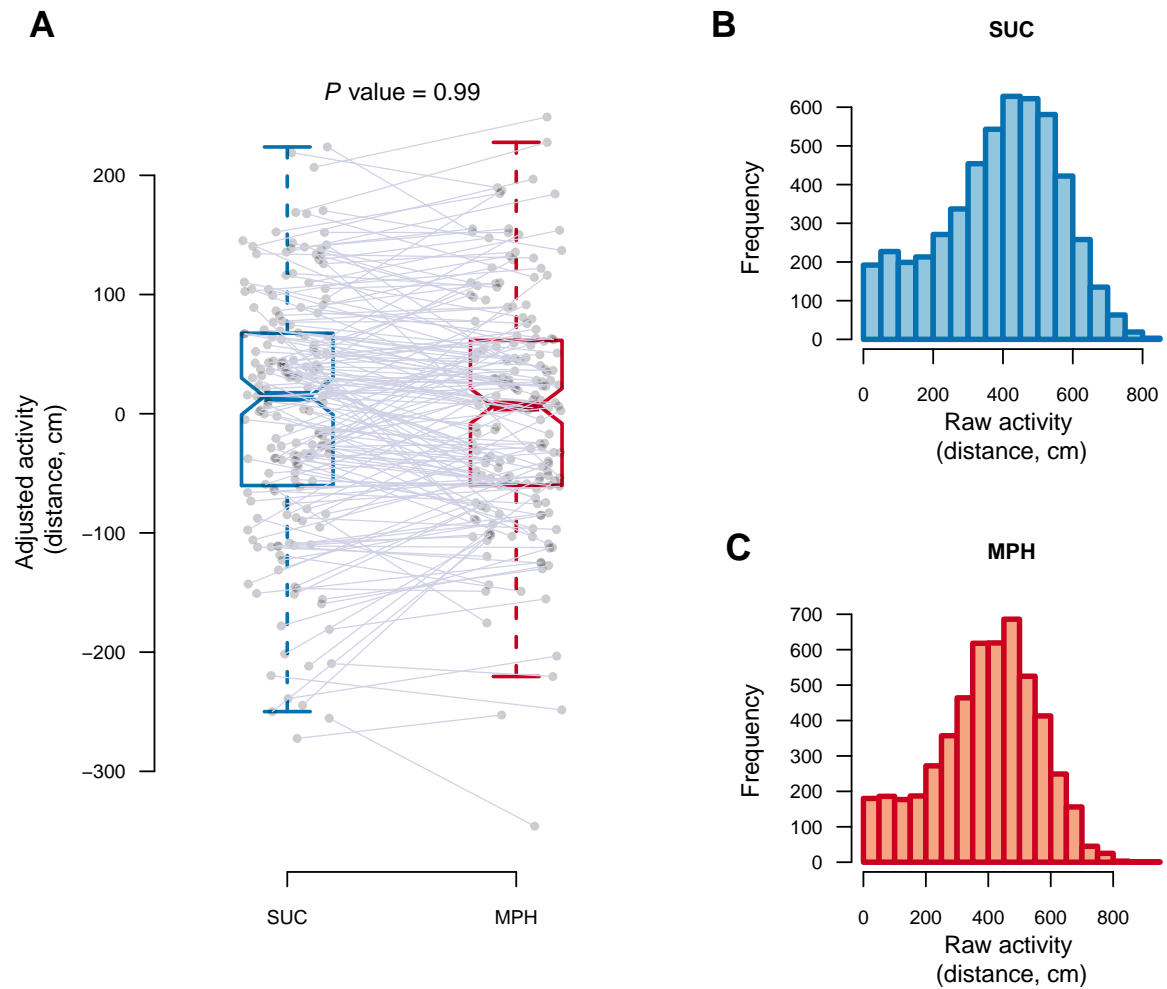

**Figure S4:** DGRP activity (adjusted values) after treatment with sucrose (SUC) or methylphenidate (MPH). **(A)** Box plots showing the distribution of mean locomotor activity for 172 DGRP lines with prior exposure to SUC or MPH. The scatter points indicate the DGRP line mean (approximately 30 males per DGRP line/treatment), and lines connecting two points represents the same DGRP line. The  $P$  value comparing the overall effect of MPH treatment is shown. **(B)** Histogram of raw activity data of SUC treated DGRP lines. **(C)** Histogram of raw activity data of MPH treated DGRP lines.

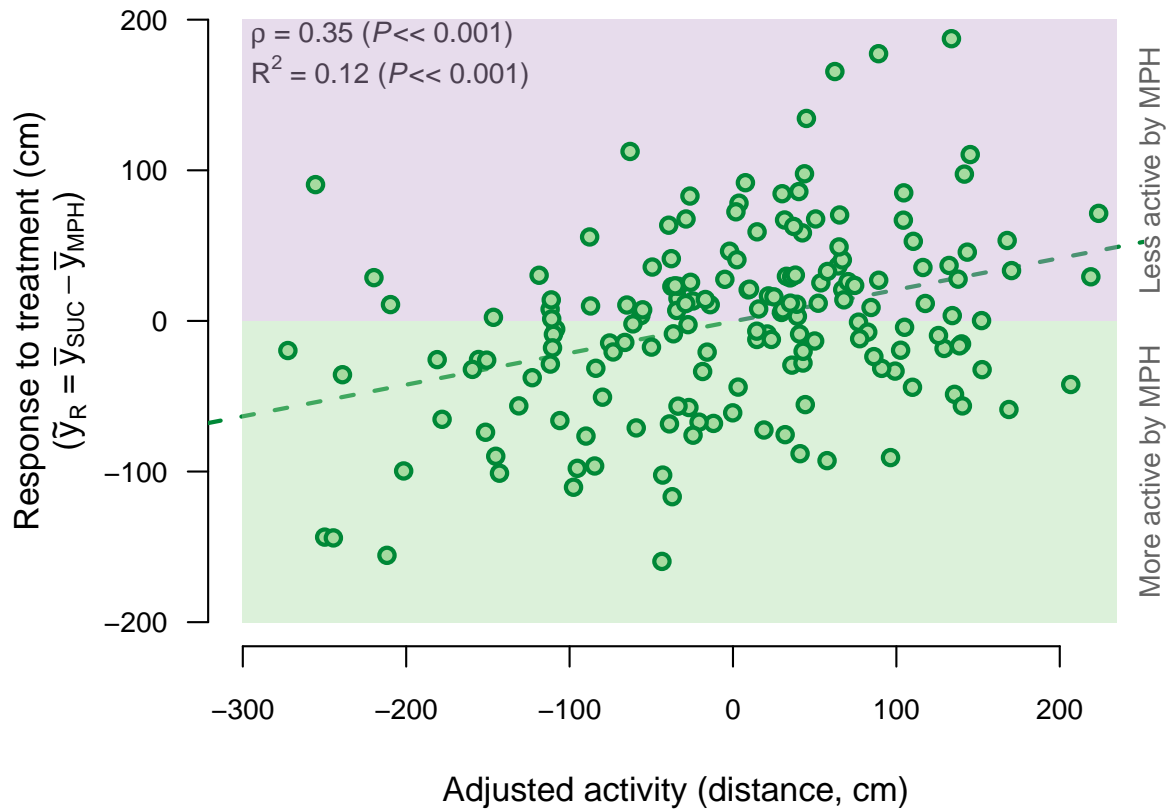

**Figure S5:** Response to treatment ( $\tilde{y}_R$ ) as function of adjusted activity data of DGRP lines exposed to the sucrose treatment. The dashed line is the regression line (variance explained ( $R^2$ ), and  $P$  value of the slope estimate is shown), and Pearson's correlation coefficient ( $\rho$ , with associated  $P$  value) is shown in the plot. The purple area ( $\tilde{y}_R > 0$ ) is where DGRP lines became less active by MPH, whereas the green area ( $\tilde{y}_R < 0$ ) is where DGRP lines became more active by MPH.



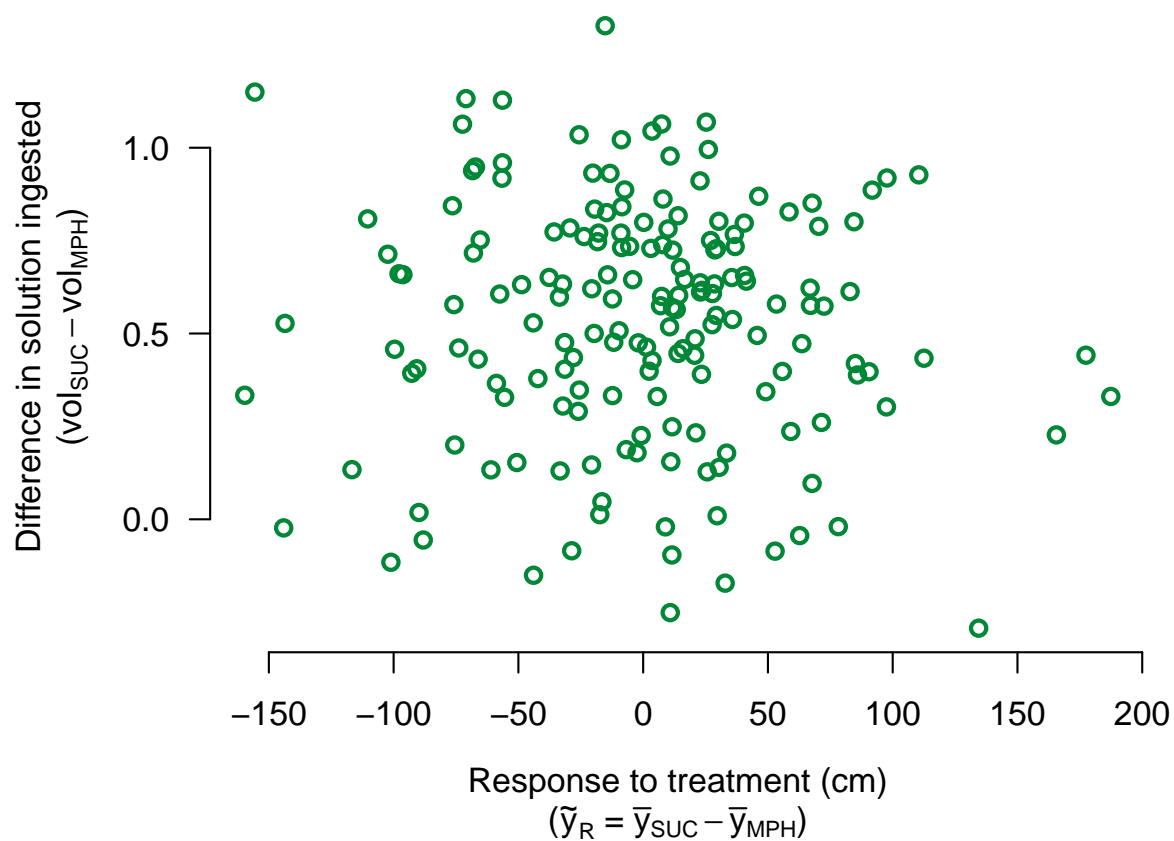

**Figure S6:** Difference in how much DGRP lines ingested of SUC and MPH treatment as a function of response to treatment ( $\tilde{y}_R$ ).

**Table S1:** Stock information on transgenic *D. melanogaster* lines used for phenotypic assessment of putative candidate genes for response to treatment with methylphenidate. VDRC: Vienna *Drosophila* Stock Center (<http://stockcenter.vdrc.at/>) BDSC: Bloomington *Drosophila* Stock Center (<https://bdsc.indiana.edu/>). Viability: Plus sign indicates if the offspring carrying the *UAS-GAL4* construct was viable and used for phenotypic assessment.

| Target gene                    | Stock center | Stock No. | Genotype                                             | Viability |
|--------------------------------|--------------|-----------|------------------------------------------------------|-----------|
| <i>Arp2</i>                    | VDRC         | 101999    | P{KK108910}VIE-260B                                  |           |
| <i>ash2</i>                    | VDRC         | 100718    | P{KK108086}VIE-260B                                  |           |
| <i>betaTub60D</i>              | VDRC         | 102052    | P{KK110523}VIE-260B                                  |           |
| <i>Caf1-55</i>                 | VDRC         | 105838    | P{KK102930}VIE-260B                                  |           |
| <i>Cfp1</i>                    | VDRC         | 110690    | P{KK101246}VIE-260B                                  | +         |
| <i>CG18418</i>                 | VDRC         | 102109    | P{KK110768}VIE-260B                                  | +         |
| <i>CG7886</i>                  | VDRC         | 109607    | P{KK100967}VIE-260B                                  | +         |
| <i>CG9314</i>                  | VDRC         | 101690    | P{KK105455}VIE-260B                                  |           |
| <i>Cpr64Ab</i>                 | VDRC         | 105517    | P{KK113267}VIE-260B                                  | +         |
| <i>dom</i>                     | VDRC         | 7789      | w[1118];P{GD1420}v7789                               |           |
| <i>Dpy-30L1</i>                | VDRC         | 27625     | w[1118]; P{GD11928}v27625                            | +         |
| <i>escl</i>                    | VDRC         | 103747    | P{KK102406}VIE-260B                                  | +         |
| <i>fest</i>                    | VDRC         | 106300    | P{KK106182}VIE-260B                                  |           |
| <i>HDAC11</i>                  | VDRC         | 108098    | P{KK101558}VIE-260B                                  |           |
| <i>Jarid2</i>                  | VDRC         | 109290    | P{KK101518}VIE-260B                                  | +         |
| <i>l(2)09851</i>               | VDRC         | 110333    | P{KK100751}VIE-260B                                  |           |
| <i>MED31</i>                   | VDRC         | 101488    | P{KK108845}VIE-260B                                  |           |
| <i>Mnn1</i>                    | VDRC         | 110376    | P{KK101050}VIE-260B                                  | +         |
| <i>mRpS28</i>                  | VDRC         | 107181    | P{KK109300}VIE-260B                                  | +         |
| <i>Myo61F</i>                  | VDRC         | 110682    | P{KK101033}VIE-260B                                  | +         |
| <i>Nurf-38</i>                 | VDRC         | 103776    | P{KK102637}VIE-260B                                  |           |
| <i>PpD6</i>                    | VDRC         | 104211    | P{KK104384}VIE-260B                                  |           |
| <i>Rbbp5</i>                   | VDRC         | 106139    | P{KK102877}VIE-260B                                  |           |
| <i>Smurf</i>                   | VDRC         | 107349    | P{KK103197}VIE-260B                                  | +         |
| <i>Sod1</i>                    | VDRC         | 108307    | P{KK102426}VIE-260B                                  | +         |
| <i>ss</i>                      | VDRC         | 108732    | P{KK107561}VIE-260B                                  |           |
| <i>Su(dx)</i>                  | VDRC         | 103814    | P{KK102798}VIE-260B                                  |           |
| <i>Su(var)3-3</i>              | VDRC         | 106147    | P{KK102965}VIE-260B                                  | +         |
| <i>trh</i>                     | VDRC         | 101509    | P{KK108906}VIE-260B                                  |           |
| <i>trr</i>                     | VDRC         | 108122    | P{KK100756}VIE-260B                                  |           |
| <i>Vhl</i>                     | VDRC         | 108920    | P{KK111257}VIE-260B                                  |           |
| <i>Wdr82</i>                   | VDRC         | 25246     | w[1118]; P{GD9340}v25246                             |           |
| <i>wds</i>                     | VDRC         | 105371    | P{KK100120}VIE-260B                                  |           |
| <i>XNP</i>                     | VDRC         | 101568    | P{KK103859}VIE-260B                                  | +         |
| <i>Yeti</i>                    | VDRC         | 102960    | P{KK113635}VIE-260B                                  |           |
| <i>YL-1</i>                    | VDRC         | 107951    | P{KK100166}VIE-260B                                  |           |
| (RNAi host KK)                 | BDSC         | 60100     | y,w[1118];P{attP,y[+],w[3']}                         |           |
| (RNAi host GD)                 | BDSC         | 60000     | w1118                                                |           |
| ( <i>tubulin</i> -GAL4 driver) | BDSC         | 5138      | y[1] w[*]; P{w[+mC]=tubP-GAL4}LL7/TM3, Sb[1], Ser[1] |           |

**Table S2:** Association between chromosomal inversions and *Wolbachia* infection status with locomotor activity for DGRP flies treated with sucrose (SUC) or methylphenidate (MPH) treatment. Statistical significance is denoted with asterisk (\*).

| Effect           | SUC      |      |         | MPH      |      |         |
|------------------|----------|------|---------|----------|------|---------|
|                  | $\chi^2$ | d.f. | P value | $\chi^2$ | d.f. | P value |
| <i>2L-t*</i>     | 7.43     | 2    | 0.024   | 11.13    | 2    | 0.0038  |
| <i>2R-NS</i>     | 0.88     | 2    | 0.64    | 0.22     | 2    | 0.9     |
| <i>2R-Y1</i>     | 0.53     | 1    | 0.46    | 0.41     | 1    | 0.52    |
| <i>2R-Y2</i>     | 0.55     | 1    | 0.46    | 0.0017   | 1    | 0.97    |
| <i>2R-Y3</i>     | 0.88     | 1    | 0.35    | 1.52     | 1    | 0.22    |
| <i>2R-Y4</i>     | 0.88     | 1    | 0.35    | 1.52     | 1    | 0.22    |
| <i>3L-P</i>      | 3.52     | 2    | 0.17    | 0.16     | 2    | 0.92    |
| <i>3L-M</i>      | 0.012    | 1    | 0.91    | 0.26     | 1    | 0.61    |
| <i>3R-P*</i>     | 11.43    | 2    | 0.003   | 9.24     | 2    | 0.009   |
| <i>3R-K</i>      | 1.27     | 2    | 0.53    | 0.49     | 2    | 0.78    |
| <i>3R-Mo</i>     | 0.29     | 2    | 0.86    | 1.6      | 2    | 0.45    |
| <i>3R-C</i>      | 0.83     | 1    | 0.36    | 1.7      | 1    | 0.19    |
| <i>Wolbachia</i> | 0.16     | 1    | 0.69    | 0.027    | 1    | 0.87    |

**Table S3:** Using maximum likelihood methods we assessed the effect of experimental factors, such as feed intake, placement, day and plate on DGRP locomotor activity. Statistical significance is denoted with asterisk (\*).

| Effect      | SUC      |      |                       | MPH      |      |                       |
|-------------|----------|------|-----------------------|----------|------|-----------------------|
|             | $\chi^2$ | d.f. | P value               | $\chi^2$ | d.f. | P value               |
| Feed intake | 0.18     | 1    | 0.67                  | 0.20     | 1    | 0.65                  |
| Placement*  | 18.0     | 1    | $2.2 \times 10^{-5}$  | 48.51    | 1    | $3.3 \times 10^{-12}$ |
| Day*        | 373.3    | 45   | $2.2 \times 10^{-16}$ | 360.63   | 44   | $2.2 \times 10^{-16}$ |
| Plate*      | 118.97   | 11   | $2.2 \times 10^{-16}$ | 106.73   | 12   | $2.2 \times 10^{-16}$ |

**Table S4:** Estimated quantitative genetic parameters for DGRP males exposed to the sucrose (SUC) or methylphenidate (MPH), for an interaction model between treatments, and for the response to treatment (the within-line mean difference in adjusted phenotypic values). The parameters includes REML variance components ( $\sigma_p^2$ : phenotypic,  $\sigma_g^2$ : genetic,  $\sigma_{g:t}^2$ : interaction between genetic and treatment effect,  $\sigma_e^2$ : residual) and broad- ( $H^2$ ) and narrow-sense heritability ( $h^2$ ) using raw phenotypes ( $y$ ) and adjusted phenotypes ( $\bar{y}$ ) for models assuming independence among DGRP lines (**I**) or using the realized relationship estimated using genome-wide SNP data (**G**). The mean predictive ability (PA) with standard errors (SE) for predictive DGRP activity after control or MPH treatment, and predicting the response to treatment

|                  | SUC                  |                                         |                                         | MPH                  |                                         |                                         | SUC:MPH              |                                         |                                         | Response    |  |
|------------------|----------------------|-----------------------------------------|-----------------------------------------|----------------------|-----------------------------------------|-----------------------------------------|----------------------|-----------------------------------------|-----------------------------------------|-------------|--|
|                  | <b>I<sub>y</sub></b> | <b>I<sub><math>\bar{y}</math></sub></b> | <b>G<sub><math>\bar{y}</math></sub></b> | <b>I<sub>y</sub></b> | <b>I<sub><math>\bar{y}</math></sub></b> | <b>G<sub><math>\bar{y}</math></sub></b> | <b>I<sub>y</sub></b> | <b>I<sub><math>\bar{y}</math></sub></b> | <b>G<sub><math>\bar{y}</math></sub></b> |             |  |
| $\sigma_p^2$     | 26884.38             | 25339.47                                | 20750.31                                | 25940.52             | 24336.04                                | 20079.76                                | 26548.08             | 24831.39                                | 2406.119                                |             |  |
| $\sigma_g^2$     | 11273.99             | 9891.214                                | 5298.233                                | 10527.17             | 9082.402                                | 4824.449                                | 9893.707             | 8224.294                                | 1147.696                                |             |  |
| $\sigma_{g:t}^2$ |                      |                                         |                                         |                      |                                         |                                         | 1166.163             | 1255.372                                |                                         |             |  |
| $\sigma_e^2$     | 15610.39             | 15448.255                               | 15452.081                               | 15413.35             | 15253.638                               | 15255.313                               | 15578.213            | 15351.726                               | 1258.422                                |             |  |
| $H^2$            | 0.42                 | 0.39                                    |                                         | 0.41                 | 0.37                                    |                                         | 0.42                 | 0.38                                    |                                         |             |  |
| $h^2$            |                      |                                         | 0.26                                    |                      |                                         | 0.24                                    |                      |                                         |                                         | 0.48        |  |
| PA               |                      |                                         | 0.14 (0.03)                             |                      |                                         | 0.12 (0.03)                             |                      |                                         |                                         | 0.30 (0.04) |  |

**Table S10:** Subset of hub genes from the list of significant predictive gene networks that has evidence of being related to histone processes, such as histone methylation and acetylation, and chromatin folding. The list is based upon the information from [flybase.org](https://flybase.org) accessed January 28, 2019. Rows highlighted in bold are the genes investigated in the current study with *UAS-GAL4* knockdown. The list of experimental evidence for each gene is by no means exhaustive, but solely focuses on a few selected known functions related to histones and chromatin. For the full list of known experimental evidence visit [flybase.org](https://flybase.org) and look up each gene.

| <b>FlyBase protein ID</b> | <b>FlyBase gene name</b>                 | <b>FlyBase gene symbol</b>    | <b>Experimental evidence</b>                                  |
|---------------------------|------------------------------------------|-------------------------------|---------------------------------------------------------------|
| FBpp0084040               | absent, small, or homeotic discs 2       | <i>ash2</i>                   | Histone H3-K4 methylation [2, 6].                             |
| FBpp0082511               | Chromatin assembly factor 1, p55 subunit | <i>Caf1-55</i>                | Histone deacetylase activity and chromatin assembly [17, 20]. |
| FBpp0071262               | CXXC finger protein 1                    | <i>Cfp1</i> (or <i>CXX1</i> ) | Histone H3-K4 methylation [11].                               |
| FBpp0071529               | domino                                   | <i>dom</i>                    | Histone acetylation and histone exchange [9].                 |
| FBpp0079701               | Dpy-30-like 1                            | <i>Dpy-30L1</i>               | Histone H3-K4 methylation [11].                               |
| FBpp0079870               | escl                                     | <i>escl</i>                   | Histone H3-K27 methylation [13].                              |
| FBpp0076196               | Jumonji, AT rich interactive domain 2    | <i>Jarid2</i>                 | Regulation of histone H3-K27 methylation [8].                 |
| FBpp0110277               | Menin 1                                  | <i>Mnn1</i>                   | Histone H3-K4 methylation [11].                               |
| FBpp0078059               | Polycomb                                 | <i>Pc</i>                     | Chromatin binding [12] and histone H3-K4 [3].                 |
| FBpp0077900               | Retinoblastoma binding protein 5         | <i>Rbbp5</i>                  | Histone H3-K4 methylation [6, 11].                            |
| FBpp0074594               | Suppressor of variegation 3-3            | <i>Su(var)3-3</i>             | Histone H3-K4 demethylation [16, 18].                         |
| FBpp0082406               | trithorax                                | <i>trx</i>                    | Histone H3-K4 methylation [3, 15].                            |
| FBpp0079266               | WD repeat domain 82                      | <i>Wdr82</i>                  | Histone H3-K4 methylation [6, 11].                            |
| FBpp0300790               | will die slowly                          | <i>uds</i>                    | Histone H3-K4 methylation [6, 11].                            |
| FBpp0084212               | XNP                                      | <i>XNP</i>                    | Chromatin silencing [5].                                      |
| FBpp0288749               | Yeti                                     | <i>Yeti</i>                   | Regulation of H3-K4 and H3-K9 methylation [10]                |
| FBpp0079735               | YL-1                                     | <i>YL-1</i>                   | Histone acetylation and exchange [9].                         |

**Table S13:** Genes that previously have been found to respond to different types of drugs, which we also identified.

| Drug exposure   | Gene symbols                                                                                                                                                                                         | References |
|-----------------|------------------------------------------------------------------------------------------------------------------------------------------------------------------------------------------------------|------------|
|                 | <i>CG10562, CG11893, CG12766, CG13658, CG13659, CG31288, CG33514, CG5724, CG6908, CG9360, Cyp12a5, Cyp12d1-d, Cyp12d1-p, Cyp4e2, Cyp6a2, Cyp9b2, GstE6, Mef2, Ugt36Ba, Ugt36Bc, Ugt86Da, Ugt86Dd</i> | [19]       |
| Methamphetamine |                                                                                                                                                                                                      |            |
| Insecticides    | <i>Cyp12d1-d, Cyp12d1-p, Cyp6a2, Cyp6a8</i>                                                                                                                                                          | [4, 7, 21] |
| Nicotine        | <i>phu</i>                                                                                                                                                                                           | [14]       |
| Caffeine        | <i>Cyp6a2, Cyp6a8</i>                                                                                                                                                                                | [1]        |

- 
- [1] Bhaskara S., *et al.* (2006) Induction of two cytochrome P450 genes, Cyp6a2 and Cyp6a8, of *Drosophila melanogaster* by caffeine in adult flies and in cell culture. *Gene* 377: 56–64.
  - [2] Beltran S., *et al.* (2007) Functional dissection of the ash2 and ash1 transcriptomes provides insights into the transcriptional basis of wing phenotypes and reveals conserved protein interactions. *Genome Biol.* 8: R67.
  - [3] Czermin B., *et al.* (2002) *Drosophila* enhancer of Zeste/ESC complexes have a histone H3 methyltransferase activity that marks chromosomal polycomb sites. *Cell* 111: 185–196.
  - [4] Daborn P. J., *et al.* (2007) Evaluating the insecticide resistance potential of eight *Drosophila melanogaster* cytochrome P450 genes by transgenic over-expression. *Insect Biochem. Mol. Biol.* 37: 512–519
  - [5] Emelyanov A. V., *et al.* (2010) Protein complex of *Drosophila* ATRX/XNP and HP1a is required for the formation of pericentric beta-heterochromatin in vivo. *J. Biol. Chem.* 285: 15027–15037.
  - [6] Hallson G., *et al.* (2012) dSet1 is the main H3K4 di- and tri-methyltransferase throughout *Drosophila* development. *Genetics* 190: 91–100.
  - [7] Helvig C., *et al.* (2012) *Drosophila melanogaster* CYP6A8, an insect P450 that catalyzes lauric acid (omega-1)-hydroxylation. *Biochem. Biophys. Res. Commun.* 325: 1495–1502.
  - [8] Herz H.-M., *et al.* (2012) Polycomb Repressive Complex 2-dependent and -independent functions of Jarid2 in transcriptional regulation in *Drosophila*. *Mol. Cell. Biol.* 32: 1683–1693.
  - [9] Kusch T., *et al.* (2004) Acetylation by Tip60 is required for selective histone variant exchange at DNA lesions. *Science* 306: 2084–2087.
  - [10] Messina G., *et al.* (2014) Yeti, an essential *Drosophila melanogaster* gene, encodes a protein required for chromatin organization. *J. Cell Sci.* 127: 2577–2588.
  - [11] Mohan M., *et al.* (2011) The COMPASS family of H3K4 methylases in *Drosophila*. *Mol. Cell. Biol.* 31: 4310–4318.
  - [12] Negre N., *et al.* (2006) Chromosomal distribution of PcG proteins during *Drosophila* development. *PLoS Biol.* 4: 0917–0932.
  - [13] Ohno K., *et al.* (2008) ESC, ESCL and their roles in Polycomb Group mechanisms. *Mech. Dev.* 125: 527–541.
  - [14] Passador-Gurgel G., *et al.* (2007) Quantitative trait transcripts for nicotine resistance in *Drosophila melanogaster*. *Nat. Genet.* 39: 264–268.
  - [15] Petruk S., *et al.* (2006) Transcription of bxd noncoding RNAs promoted by Trithorax represses Ubx in cis by transcriptional interference. *Cell* 127: 1209–1221.
  - [16] Rudolph T., *et al.* (2007) Heterochromatin formation in *Drosophila* is initiated through active removal of H3K4 methylation by the LSD1 homolog SU(VAR)3-3. *Mol. Cell* 26: 103–115.
  - [17] Song Y., *et al.* (2007) CAF-1 is essential for *Drosophila* development and involved in the maintenance of epigenetic memory. *Dev. Biol.* 311: 213–222.
  - [18] Stefano L. Di, *et al.* (2011) Functional antagonism between histone H3K4 demethylases in vivo. *Genes Dev.* 25: 17–28.
  - [19] Sun L., *et al.* (2011) Systems-scale analysis reveals pathways involved in cellular response to methamphetamine. *PLoS One* 6:e18215.
  - [20] Tyler J. K., *et al.* (2011) The p55 subunit of *Drosophila* chromatin assembly factor 1 is homologous to a histone deacetylase-associated protein. *Mol. Cell. Biol.* 16: 6149–6159.
  - [21] Wan H., *et al.* (2014) Nrf2/Maf-binding-site-containing functional Cyp6a2 allele is associated with DDT resistance in *Drosophila melanogaster*. *Pest Manag. Sci.* 70: 1048–1058.
